# Supplementary material for: Effect of Potato Vine and Leaf Mixed Silage to Whole Corn Crops on Rumen Fermentation and the Microbe of Fatten Angus Bulls
Source: MDPI journal article supplement (doi:10.3390/fermentation9080704), 2023-07-26
Supplement: s1 [file s1]

# Effect of Potato Vine and Leaf Mixed Silage to Whole Corn Crops on Rumen Fermentation and the Microbe of Fatten Angus Bulls

Siyu Zhang <sup>1,†</sup>, Jiajie Deng <sup>1,†</sup>, Yafang Cui <sup>1</sup>, Lina Wang <sup>1</sup>, Yingqi Li <sup>1</sup>, Xianli Wang <sup>1</sup>, Shengnan Min <sup>1</sup>, Huili Wang <sup>1</sup>, Qianzi Zhang <sup>1</sup>, Peiqi Li <sup>1</sup>, Yawen Luo <sup>1</sup>, Xinjun Qiu <sup>2</sup>, Yang He <sup>1</sup>, Binghai Cao <sup>1</sup>, Huawei Su <sup>1,\*</sup>

<sup>1</sup> State Key Laboratory of Animal Nutrition, College of Animal Science and Technology, China Agricultural University, Beijing 100107, China; s20213040648@cau.edu.cn (S.Z.); 18811560713@163.com (J.D.); s20203040609@cau.edu.cn (Y.C.); linalinaw@163.com (L.W.); liyingqi1230@163.com (Y.L.); w18832607007@163.com (X.W.); sy20223040817@cau.edu.cn (S.M.); wanghlzn@126.com (H.W.); dili1899@163.com (Q.Z.); peppalily@163.com (P.L.); luoyawen230023@163.com (Y.L.); heycau@163.com (Y.H.); caobh@cau.edu.cn (B.C.)  
<sup>2</sup> College of Animal Science and Technology, Hainan University, Hainan 570228, China; qiuxinjun@hainanu.edu.cn  
\* Corresponding Author: suhuawei@cau.edu.cn  
† These authors contributed equally to this work.

Table S1. Buffer solution composition.

| Solution                    | Component (1000ml)                                                                                                                                                      | Volume(ml) |
|-----------------------------|-------------------------------------------------------------------------------------------------------------------------------------------------------------------------|------------|
| Distilled water             |                                                                                                                                                                         | 2400       |
| Trace element solution A    | 13.2g CaCl <sub>2</sub> ·2H <sub>2</sub> O,10g MnCl <sub>2</sub> ·4H <sub>2</sub> O,1g CoCl <sub>2</sub> ·6H <sub>2</sub> O,<br>8g FeCl <sub>2</sub> ·6H <sub>2</sub> O | 0.6        |
| Artificial saliva B         | 35g NaHCO <sub>3</sub> , 4g NH <sub>4</sub> HCO <sub>3</sub>                                                                                                            | 1200       |
| Constant element solution C | 5.7g Na <sub>2</sub> HPO <sub>4</sub> , 6.2g KH <sub>2</sub> PO <sub>4</sub> , 0.6g MgSO <sub>4</sub> ·7H <sub>2</sub> O                                                | 1200       |
| Resazurin solution D        | 1g Resazurin                                                                                                                                                            | 6          |
| Reducing agent solution     | 6.25g Na <sub>2</sub> S·9H <sub>2</sub> O, 40 mL 1 M NaOH                                                                                                               | 240        |

Table S2. The diversity index of bacterial communities in the rumen in three different dietary silage groups.

| Items         | CS     | PVS 1  | PVS 2  | SEM    | <i>p</i> -value |
|---------------|--------|--------|--------|--------|-----------------|
| ACE           | 639.65 | 629.90 | 669.70 | 12.16  | 0.459           |
| Chao1         | 641.26 | 629.81 | 669.71 | 12.16  | 0.472           |
| Simpson       | 1.00   | 0.99   | 1.00   | 0.0016 | 0.181           |
| Shannon       | 8.54   | 8.48   | 8.67   | 0.08   | 0.654           |
| PD whole tree | 35.47  | 35.48  | 37.27  | 0.44   | 0.159           |
| Coverage      | 1.000  | 1.000  | 0.9999 |        |                 |

**Table S3.** The relative abundance of dominant bacteria was  $\geq 0.1\%$  (phylum level).

| Items                 | CS                | PVS 1             | PVS 2              | SEM    | <i>p</i> -value |
|-----------------------|-------------------|-------------------|--------------------|--------|-----------------|
| Bacteroidota          | 52.0              | 53.4              | 50.0               | 1.63   | 0.711           |
| Firmicutes            | 33.7              | 36.6              | 38.4               | 1.81   | 0.595           |
| Proteobacteria        | 7.20 <sup>a</sup> | 2.73 <sup>b</sup> | 4.78 <sup>ab</sup> | 0.708  | 0.034           |
| Fibrobacterota        | 2.49              | 2.23              | 2.43               | 0.237  | 0.849           |
| Patescibacteria       | 1.60              | 1.53              | 1.33               | 0.119  | 0.587           |
| Verrucomicrobiota     | 1.07              | 1.84              | 1.36               | 0.206  | 0.630           |
| Spirochaetota         | 0.881             | 0.270             | 0.357              | 0.113  | 0.057           |
| Desulfobacterota      | 0.301             | 0.574             | 0.379              | 0.0640 | 0.202           |
| Elusimicrobiota       | 0.144             | 0.220             | 0.160              | 0.0294 | 0.565           |
| unclassified_Bacteria | 0.0462            | 0.299             | 0.292              | 0.0665 | 0.135           |
| Synergistota          | 0.0862            | 0.179             | 0.133              | 0.0185 | 0.077           |
| Actinobacteriota      | 0.258             | 0.103             | 0.128              | 0.0527 | 0.751           |
| Cyanobacteria         | 0.109             | 0.0350            | 0.178              | 0.0360 | 0.444           |
| others                | 0.0628            | 0.0625            | 0.0737             | 0.0167 | 0.958           |

There is a significant difference between different groups marked with different lowercase letters within the same row in table.

**Table S4.** The relative abundance of dominant bacteria was  $\geq 1\%$  (family level).

| Items                                        | CS                 | PVS1               | PVS2               | SEM   | <i>p</i> -value |
|----------------------------------------------|--------------------|--------------------|--------------------|-------|-----------------|
| <i>Prevotella</i>                            | 29.8 <sup>a</sup>  | 19.3 <sup>b</sup>  | 21.5 <sup>b</sup>  | 1.43  | 0.001           |
| <i>uncultured_rumen_bacterium</i>            | 6.32 <sup>b</sup>  | 9.06 <sup>a</sup>  | 7.52 <sup>ab</sup> | 0.456 | 0.037           |
| <i>Rikenellaceae_RC9_gut_group</i>           | 5.00               | 7.93               | 6.93               | 0.580 | 0.106           |
| <i>Ruminococcus</i>                          | 3.80               | 2.86               | 2.17               | 0.425 | 0.308           |
| <i>Succiniclasicum</i>                       | 3.62               | 3.35               | 2.84               | 0.283 | 0.676           |
| <i>unclassified_F082</i>                     | 3.01               | 7.35               | 5.54               | 0.768 | 0.064           |
| <i>Prevotellaceae_UCG_001</i>                | 2.78               | 2.12               | 2.12               | 0.198 | 0.306           |
| <i>Prevotellaceae_UCG_003</i>                | 2.60               | 2.77               | 2.01               | 0.196 | 0.148           |
| <i>Fibrobacter</i>                           | 2.49               | 2.23               | 2.43               | 2.380 | 0.849           |
| <i>unclassified_Lachnospiraceae</i>          | 2.49               | 1.95               | 2.76               | 0.169 | 0.139           |
| <i>Ruminobacter</i>                          | 2.28               | 0.624              | 1.92               | 0.382 | 0.180           |
| <i>Succinivibrionaceae_UCG_002</i>           | 2.25               | 0.816              | 1.21               | 0.328 | 0.189           |
| <i>unclassified_Prevotellaceae</i>           | 2.18 <sup>a</sup>  | 1.69 <sup>ab</sup> | 1.09 <sup>b</sup>  | 0.155 | 0.007           |
| <i>Saccharofermentans</i>                    | 1.85               | 2.19               | 2.27               | 0.129 | 0.382           |
| <i>NK4A214_group</i>                         | 1.69               | 3.01               | 2.78               | 0.278 | 0.114           |
| <i>unclassified_Ruminococcaceae</i>          | 1.31               | 1.23               | 2.78               | 0.339 | 0.107           |
| <i>unclassified_Bacteroidales_RF16_group</i> | 1.17               | 0.821              | 1.03               | 0.115 | 0.738           |
| <i>unclassified_Clostridia</i>               | 1.13               | 2.07               | 2.06               | 0.239 | 0.184           |
| <i>Lachnospiraceae_XPB1014_group</i>         | 0.728 <sup>b</sup> | 1.01 <sup>ab</sup> | 1.35 <sup>a</sup>  | 0.104 | 0.040           |
| <i>Bacteroidales_bacterium_Bact_22</i>       | 0.026 <sup>b</sup> | 4.40 <sup>ab</sup> | 3.18 <sup>a</sup>  | 1.42  | 0.013           |
| Others                                       | 23.5               | 23.2               | 24.5               | 0.751 | 0.798           |

There is a significant difference between different groups marked with different lowercase letters within the same row in table.
